# Supplementary material
Source: PubMed Central journal article supplement (PMC9870646)
Supplement: Meunier.pdf [file Meunier.pdf]

Supplemental materials for

Meunier P, Raynaud C, Guimaraes E, Gueyffier F, Letrilliart L. Barriers and facilitators to the use of clinical decision support systems in primary care: a mixed-methods systematic review. *Ann Fam Med*. 2023;21(1):57-69.

## Supplemental Appendix 1. Search equations

### PubMed/MEDLINE

("decision support systems, clinical"[mh] OR "decision making, computer-assisted"[mh] OR "clinical decision support"[tw] OR CDSS[tw] OR CCDSS[tw])

AND (integrat\*[tw] OR implement\*[tw] OR "health knowledge, attitudes, practice"[mh] OR "professional competence" [mh] OR "attitude to computers"[mh] OR "attitude of health personnel"[mh] OR attitude[tw] OR satisfaction[tw] OR feedback\*[tw] OR drawback\*[tw] OR imped\*[tw] OR facilitat\*[tw] OR adherence[tw] OR hinder\*[tw] OR barrier\*[tw] OR perception\*[tw] OR opinion\*[tw] OR compliance[tw] OR acceptability[tw] OR acceptance[tw] OR insight\*[tw])

AND ("primary health care"[mh] OR "physicians, family"[mh] OR "family practice"[mh] OR "primary care nursing"[mh] OR "physicians, primary care"[mh] OR "primary care"[tw] OR "primary healthcare"[tw] OR "primary health care"[tw] OR "family physician\*"[tw] OR "general practice\*"[tw] OR "general practitioner\*"[tw] OR gp[tw] OR gps[tw] OR "primary care nursing"[tw] OR "community setting\*"[tw])

Filtres : french, english, journal article

### EMBASE

('decision support system'/exp OR 'decision support system' OR 'clinical decision support system'/exp OR 'clinical decision support system')

AND ('barriers' OR 'adherence' OR 'health personnel attitude'/exp OR 'health personnel attitude' OR 'satisfaction'/exp OR satisfaction OR barrier\* OR opinion OR adherence OR acceptability)

AND ('primary health care'/exp OR 'primary health care' OR 'family medicine'/exp OR 'family medicine' OR 'general practice'/exp OR 'general practice' OR 'general practitioner'/exp OR 'general practitioner')

### PsycInfo, CINAHL (EBSCO)

S1 ;"decision support system" OR CDSS OR CCDSS OR "decision making, computer assisted"

S2 ;integrat\* OR implement\* OR attitude\* OR satisfaction OR feedback\* OR drawback\* OR imped\* OR facilitat\* OR "adherence" OR hinder\* OR barrier\* OR perception\* OR opinion\* OR compliance OR acceptability OR acceptance OR insight\*

S3 ;"primary health care" OR "family practice" OR "primary nursing" OR "primary care" OR "primary healthcare" OR "primary health care" OR "family physician\*" OR "general practice" OR "general practitioner\*" OR gp OR "primary nurse\*" OR "primary nursing" OR "community setting\*"

S4 ; S1 AND S2 AND S3

### The Cochrane Library

("decision support systems, clinical" OR "decision making, computer-assisted" OR "clinical decision support" OR CDSS OR CCDSS):ti,ab,kw

AND ("health knowledge, attitudes, practice" OR "professional competence" OR "attitude to computers" OR "attitude of health personnel" OR attitude? OR satisfaction OR feedback? OR drawback? OR imped\* OR facilitat\*

OR adherence OR hinder? OR barrier? OR perception? OR opinion? OR compliance OR acceptability OR acceptance OR insight):ti,ab,kw

AND ("primary health care" OR "physicians, family" OR "family practice" OR "primary care nursing" OR "physicians, primary care" OR "primary care" OR "primary healthcare" OR "primary health care" OR "family physician?" OR "general practice?" OR "general practitioner?" OR gp? OR "primary care nursing" OR "community setting?"):ti,ab,kw"

**Supplemental Table 1. CDSS features extracted from the included studies, with pre-defined categories**

|                                                                             |                                                                                                                               |
|-----------------------------------------------------------------------------|-------------------------------------------------------------------------------------------------------------------------------|
| <b>Features extracted</b>                                                   |                                                                                                                               |
| <b>Background information</b>                                               |                                                                                                                               |
| CDSS name                                                                   |                                                                                                                               |
| Country of development                                                      |                                                                                                                               |
| Country of use                                                              |                                                                                                                               |
| Supported language(s)                                                       |                                                                                                                               |
| Commercialisation status                                                    | Yes / Ongoing / No / Not anymore / Unknown                                                                                    |
| Developed in collaboration with PCPs                                        | Yes / No / Unknown                                                                                                            |
| <b>Targets</b>                                                              |                                                                                                                               |
| Users                                                                       | Primary care physicians / Other specialists / Primary care residents / Nurses / Other PCPs (non-physicians)                   |
| Care procedures                                                             | Prevention (iatrogenesis) / Prevention (disease, test ordering) / Diagnosis / Therapeutics / Management of chronic disease(s) |
| Health issue(s)                                                             |                                                                                                                               |
| <b>Knowledge base</b>                                                       |                                                                                                                               |
| Knowledge-based CDSS                                                        | Yes / No / Unknown                                                                                                            |
| Updates of the knowledge base                                               | Yes / No / Unknown                                                                                                            |
| Cites the strength of evidence                                              | Yes / No / Unknown                                                                                                            |
| Provides links to the sources of the recommendations                        | Yes / No / Unknown                                                                                                            |
| Provides educational materials to assist patients in shared decision-making | Yes / No / Unknown                                                                                                            |
| <b>Interface</b>                                                            |                                                                                                                               |
| EHR integration                                                             | Fully integrated / Partially integrated / Not integrated                                                                      |
| Data entry by the PCP                                                       | Yes, during consultations / Yes, outside and/or during consultations / No                                                     |
| Data entry by the patient                                                   | Yes, before the consultation / No                                                                                             |
| Duplication of data entry                                                   | Yes / No                                                                                                                      |
| Active/Passive                                                              |                                                                                                                               |

**Push/Pull**

**Interruptive or not**

**Requires reason to override**

Yes / No / Unknown

**PCPs trained to the CDSS**

Yes / No/ Unknown

## Supplemental Appendix 2. Tables of detailed features of included CDSSs

### Supplemental Appendix 2A. Background information

| Study | CDSS Name                                  | Country of development                        | Country of use           | Supported language(s)            | Commercialization                                                                              | Developed in collaboration with PCPs |         |
|-------|--------------------------------------------|-----------------------------------------------|--------------------------|----------------------------------|------------------------------------------------------------------------------------------------|--------------------------------------|---------|
| 1     | Abimbola et al. 2019                       | HealthTracker                                 | Australia                | Australia                        | English                                                                                        | Ongoing                              | Yes     |
| 2     | afKlercker et al. 1998                     | Unknown                                       | Sweden                   | Sweden                           | Swedish                                                                                        | Unknown                              | Yes     |
| 3     | Alagiakrishnan et al. 2016                 | SMART CDS                                     | Canada                   | Canada                           | English                                                                                        | Unknown                              | Yes     |
| 4     | Arts et al. 2018                           | Unknown                                       | The Netherlands          | The Netherlands                  | English                                                                                        | Unknown                              | Yes     |
| 5     | Ash et al. 2011                            | Unknown                                       | United States of America | United States of America         | English                                                                                        | Yes                                  | Yes     |
| 6     | Bandong et al. 2019                        | My Whiplash Navigator                         | Australia                | Australia                        | English                                                                                        | Yes                                  | Yes     |
| 7     | Bessat et al. 2019                         | Registre Electronique des Consultations (REC) | Switzerland              | Burkina Faso                     | French                                                                                         | Yes                                  | Yes     |
| 8     | Bindels et al. 2003                        | GRIF Automated Feedback System                | The Netherlands          | The Netherlands                  | Dutch                                                                                          | Unknown                              | Unknown |
| 9     | Curry et al. 2011                          | Decision Support Server                       | Canada                   | Canada                           | English                                                                                        | Not commercialized                   | Unknown |
| 10    | Dixon et al. 2013                          | Unknown                                       | United States of America | United States of America         | English                                                                                        | Not commercialized                   | Yes     |
| 11    | Doerr et al. 2014                          | My Family                                     | United States of America | United States of America         | English                                                                                        | Yes                                  | Yes     |
| 12    | Edelman et al. 2014                        | The Pregnancy and Health Profile (PHP)        | United States of America | United States of America         | English                                                                                        | Yes                                  | Yes     |
| 13    | Feldstein et al. 2013                      | Patient Panel-Support Tool (PST)              | United States of America | United States of America         | English                                                                                        | Unknown                              | Yes     |
| 14    | Guenther et al. 2019                       | McMaster Pain Assistant (MPA)                 | Canada                   | Canada                           | English                                                                                        | Not anymore                          | Yes     |
| 15    | Helldèn et al. 2015                        | The renal button                              | Sweden                   | Sweden                           | English                                                                                        | Unknown                              | Yes     |
| 16    | Heselmans et al. 2020, Koskela et al. 2016 | EBMeDS                                        | Finland                  | Finland, Estonia, Belgium, Italy | Finnish, Swedish, English, Estonian, French, Dutch, Italian, German (Russian being translated) | Yes                                  | Yes     |
| 17    | Jensen et al. 2019                         | eIMCI                                         | South Africa             | South Africa                     | English                                                                                        | Yes                                  | Yes     |
| 18    | Jenssen et al. 2016                        | Unknown                                       | United States of America | United States of America         | English                                                                                        | Not commercialized                   | Yes     |

|    |                                            |                                            |                                                       |                                     |                                      |                    |         |
|----|--------------------------------------------|--------------------------------------------|-------------------------------------------------------|-------------------------------------|--------------------------------------|--------------------|---------|
| 19 | Kempe et al. 2017                          | Immunization information systems           | United States of America                              | United States of America            | English                              | Unknown            | Unknown |
| 20 | LamShinCheung et al. 2020                  | eAMS (Electronic Asthma Management System) | Canada                                                | Canada                              | English                              | Ongoing            | Yes     |
| 21 | Lemke et al. 2020                          | The Genetic and Wellness Assessment        | United States of America                              | United States of America            | English                              | Yes                | Unknown |
| 22 | Litvin et al. 2012                         | ABX-TRIP CDSS                              | United States of America                              | United States of America            | English                              | Not commercialized | Yes     |
| 23 | Litvin et al. 2016                         | Unknown                                    | United States of America                              | United States of America            | English                              | Not commercialized | Yes     |
| 24 | Lugtenberg et al. 2015 (2 articles)        | NHGDoc                                     | The Netherlands                                       | The Netherlands                     | Dutch                                | Yes                | No      |
| 25 | Maia et al. 2016                           | Unknown                                    | Brazil                                                | Brazil                              | Portuguese                           | Not commercialized | Yes     |
| 26 | Marcolino et al. 2021                      | Unknown                                    | Brazil                                                | Brazil                              | Portuguese                           | Yes                | Yes     |
| 27 | Minian et al. 2021                         | Unknown                                    | Canada                                                | Canada                              | English                              | Not commercialized | Yes     |
| 28 | Montini et al. 2013                        | Unknown                                    | United States of America                              | United States of America            | English                              | Not commercialized | Yes     |
| 29 | Pannebakker et al. 2019                    | Unknown                                    | England                                               | England                             | English                              | Unknown            | Yes     |
| 30 | Peiris et al. 2014                         | Unknown                                    | Australia                                             | Australia                           | English                              | Not commercialized | Yes     |
| 31 | Praveen et al. 2014                        | Unknown                                    | Inde + Australia + England + United States of America | Inde + Indonesia + Thailand         | English, Telugu, Hindi, Bahasa, Thai | Ongoing            | Yes     |
| 32 | Price et al. 2017                          | Unknown                                    | Canada                                                | Canada                              | English                              | Yes                | Yes     |
| 33 | Richardson et al. 2019                     | Unknown                                    | United States of America                              | United States of America            | English                              | Not commercialized | Unknown |
| 34 | Rieckert et al. 2018 and 2019 (2 articles) | PRIMA-eDS tool                             | Finland                                               | Germany + Austria + Italy + England | German, Italian, English             | Yes                | Yes     |
| 35 | Rousseau et al. 2003                       | Unknown                                    | England                                               | England                             | English                              | Not commercialized | Unknown |
| 36 | Rubin et al. 2006                          | Unknown                                    | United States of America                              | United States of America            | English                              | Unknown            | Yes     |
| 37 | Silveira et al. 2019                       | TeleHAS                                    | Brazil                                                | Brazil                              | Portuguese                           | Not commercialized | Yes     |
| 38 | Sukums et al. 2015                         | The QUALMAT eCDSS                          | Germany                                               | Ghana + Tanzania + Burkina Faso     | Unknown                              | Unknown            | Yes     |
| 39 | Toth-Pal et al. 2008                       | Evibase                                    | Sweden                                                | Sweden                              | Swedish                              | Not anymore        | Yes     |
| 40 | Trafton et al. 2010                        | ATHENA-OT                                  | United States of America                              | United States of America            | English                              | Not commercialized | Yes     |

---

|    |                      |                                                  |                          |                          |         |                    |         |
|----|----------------------|--------------------------------------------------|--------------------------|--------------------------|---------|--------------------|---------|
| 41 | Trinkley et al. 2021 | Unknown                                          | United States of America | United States of America | English | Not commercialized | Yes     |
| 42 | Wan et al. 2012      | Unknown                                          | Australia                | Australia                | English | Not commercialized | Yes     |
| 43 | Williams et al. 2016 | Pediatric Cardiovascular Risk Reduction CDS Tool | United States of America | United States of America | English | Unknown            | Unknown |
| 44 | Wilson et al. 2007   | EMPOWER                                          | Australia                | Australia                | English | Not commercialized | Yes     |
| 45 | Zheng et al. 2005    | Clinical Reminder System (CRS)                   | United States of America | United States of America | English | Not commercialized | Yes     |

---

## Supplemental Appendix 2B. CDSS targets

| Study | CDSS Name                                  | Users                                         | Care procedures                                                                        | Health issues                                                                              |                                                                                                                                                                                                              |
|-------|--------------------------------------------|-----------------------------------------------|----------------------------------------------------------------------------------------|--------------------------------------------------------------------------------------------|--------------------------------------------------------------------------------------------------------------------------------------------------------------------------------------------------------------|
| 1     | Abimbola et al. 2019                       | HealthTracker                                 | Primary care physicians                                                                | Prevention (disease, test ordering)                                                        | Treatment of cardiovascular risk                                                                                                                                                                             |
| 2     | afKlercker et al. 1998                     | Unknown                                       | Primary care physicians, nurses                                                        | Diagnosis                                                                                  | Ear, nose, and throat diseases                                                                                                                                                                               |
| 3     | Alagiakrishnan et al. 2016                 | SMART CDS                                     | Primary care physicians, other specialists                                             | Prevention (iatrogenesis)                                                                  | Giving rapid recommendations on the adaption of medication to renal function from the patient's EHR                                                                                                          |
| 4     | Arts et al. 2018                           | Unknown                                       | Primary care physicians                                                                | Global management of chronic disease(s)                                                    | Atrial fibrillation, diabetes, hypertension, medication prescriptions relating to care of older adults                                                                                                       |
| 5     | Ash et al. 2011                            | Unknown                                       | Primary care physicians, Nurses, Other PCPs (non-physicians)                           | Diagnosis, therapeutics (prescribing, vaccination)                                         | Drug-drug, drug-condition, and drug-allergy interaction checking; patient care plan dashboard that includes alerts and reminders; nearly 3000 condition specific point-and-click templates for documentation |
| 6     | Bandong et al. 2019                        | My Whiplash Navigator                         | Primary care physicians, primary care residents, other PCPs (non-physicians), patients | Therapeutics (prescribing, vaccination)                                                    | Whiplash-associated disorders                                                                                                                                                                                |
| 7     | Bessat et al. 2019                         | Registre Electronique des Consultations (REC) | Nurses, other PCPs (non-physicians)                                                    | Diagnosis, therapeutics (prescribing, vaccination)                                         | Assessment, classification, and treatment of children under the age of 5 year                                                                                                                                |
| 8     | Bindels et al. 2003                        | GRIF Automated Feedback System                | Primary care physicians                                                                | Prevention (disease, test ordering)                                                        | Comments on the appropriateness of diagnostic tests ordered by general practitioners based on recommendations from accepted national and regional practice guidelines                                        |
| 9     | Curry et al. 2011                          | Decision Support Server                       | Primary care physicians                                                                | Prevention (disease, test ordering)                                                        | Diagnostic imaging prescriptions                                                                                                                                                                             |
| 10    | Dixon et al. 2013                          | Unknown                                       | Primary care physicians, other specialists                                             | Prevention (disease, test ordering), global management of chronic disease(s)               | Hypertension, diabetes, coronary artery disease                                                                                                                                                              |
| 11    | Doerr et al. 2014                          | My Family                                     | Primary care physicians, other specialists, nurses                                     | Prevention (disease, test ordering)                                                        | Cancer risk management                                                                                                                                                                                       |
| 12    | Edelman et al. 2014                        | The Pregnancy and Health Profile (PHP)        | Primary care physicians, other specialists, nurses                                     | Prevention (disease, test ordering)                                                        | Prenatal genetic screening and clinical decision support                                                                                                                                                     |
| 13    | Feldstein et al. 2013                      | Patient Panel-Support Tool (PST)              | Primary care physicians, nurses, other PCPs (non-physicians)                           | Prevention (iatrogenesis, disease, test ordering), global management of chronic disease(s) | Graphically displays care gaps (e.g., for screening, medication use, monitoring, risk-factor control, immunizations)                                                                                         |
| 14    | Guenter et al. 2019                        | McMaster Pain Assistant (MPA)                 | Primary care physicians, nurses, primary care residents                                | Diagnosis, therapeutics (prescribing, vaccination)                                         | Neuropathic pain                                                                                                                                                                                             |
| 15    | Helldèn et al. 2015                        | The renal button                              | Primary care physicians                                                                | Prevention (iatrogenesis)                                                                  | Giving rapid recommendations on the adaption of medication to renal function from the patient's EHR                                                                                                          |
| 16    | Heselmans et al. 2020, Koskela et al. 2016 | EBMeDS                                        | Primary care physicians, nurses                                                        | Prevention (iatrogenesis, disease, test ordering), therapeutics (prescribing,              | Guideline assistant, drug interaction and contraindication reminders, drug choice suggestions (indications), reminders of drug restrictions and dosing in renal malfunction, reminders of drug               |

|    |                                     |                                            |                                                              |                                                                                                                                    |                                                                                                                                                                                                 |
|----|-------------------------------------|--------------------------------------------|--------------------------------------------------------------|------------------------------------------------------------------------------------------------------------------------------------|-------------------------------------------------------------------------------------------------------------------------------------------------------------------------------------------------|
|    |                                     |                                            |                                                              | vaccination), global management of chronic disease(s)                                                                              | restrictions during pregnancy and lactation, other rules related to > 1000 international guidelines, form assistant to help with duplication of data collection                                 |
| 17 | Jensen et al. 2019                  | eIMCI                                      | Nurses                                                       | Prevention (disease, test ordering), therapeutics (prescribing, vaccination)                                                       | Management of childhood illness                                                                                                                                                                 |
| 18 | Jenssen et al. 2016                 | Unknown                                    | Nurses, other specialists                                    | Prevention (disease, test ordering), Therapeutics (prescribing, vaccination)                                                       | Smoking cessation                                                                                                                                                                               |
| 19 | Kempe et al. 2017                   | Immunization information systems           | Primary care physicians, other specialists                   | Prevention (disease, test ordering)                                                                                                | Management of vaccination                                                                                                                                                                       |
| 20 | LamShinCheung et al. 2020           | eAMS (Electronic Asthma Management System) | Primary care physicians, nurses, primary care residents      | Therapeutics (prescribing, vaccination), global management of chronic disease(s)                                                   | Asthma                                                                                                                                                                                          |
| 21 | Lemke et al. 2020                   | The Genetic and Wellness Assessment        | Primary care physicians, other specialists                   | Prevention (disease, test ordering)                                                                                                | Identifying patients who have an increased probability of an inherited condition (related to cancer, cardiology, neurology, and endocrinology), and facilitating appropriate follow-up and care |
| 22 | Litvin et al. 2012                  | ABX-TRIP CDSS                              | Primary care physicians, nurses, other PCPs (non-physicians) | Prevention (disease, test ordering), diagnosis, therapeutics (prescribing)                                                         | Management of acute respiratory infections                                                                                                                                                      |
| 23 | Litvin et al. 2016                  | Unknown                                    | Primary care physicians, nurses, other PCPs (non-physicians) | Prevention (disease, test ordering)                                                                                                | Identification and management of chronic kidney disease                                                                                                                                         |
| 24 | Lugtenberg et al. 2015 (2 articles) | NHGDdoc                                    | Primary care physicians, nurses                              | Prevention (disease, test ordering, iatrogenesis) therapeutics (prescribing, vaccination), global management of chronic disease(s) | Cardiovascular risk management, asthma/COPD, diabetes mellitus type II, thyroid disorders, viral hepatitis and other liver diseases, atrial fibrillation, and subfertility                      |
| 25 | Maia et al. 2016                    | Unknown                                    | Primary care physicians, nurses                              | Global management of chronic disease(s)                                                                                            | Diabetes (T2)                                                                                                                                                                                   |
| 26 | Marcolino et al. 2021               | Unknown                                    | Primary care physicians, nurses, other PCPs (non-physicians) | Prevention (disease, test ordering), global management of chronic diseases                                                         | Diabetes (T2), hypertension, cardiovascular risk treatment                                                                                                                                      |
| 27 | Minian et al. 2021                  | Unknown                                    | Nurses, other PCPs (non-physicians)                          | Prevention (disease, test ordering)                                                                                                | Alcohol intervention                                                                                                                                                                            |
| 28 | Montini et al. 2013                 | Unknown                                    | Other PCPs (non-physicians)                                  | Prevention (disease, test ordering), therapeutics (prescribing, vaccination)                                                       | Tobacco use screening and treatment                                                                                                                                                             |
| 29 | Pannebakker et al. 2019             | Unknown                                    | Primary care physicians                                      | Prevention (disease, test ordering)                                                                                                | Assessment of pigmented skin lesions                                                                                                                                                            |
| 30 | Peiris et al. 2014                  | Unknown                                    | Primary care physicians                                      | Diagnosis, therapeutics (prescribing, vaccination)                                                                                 | Management of back pain                                                                                                                                                                         |
| 31 | Praveen et al. 2014                 | Unknown                                    | Primary care physicians, other PCPs (non-physicians)         | Global management of chronic disease(s)                                                                                            | Cardiovascular risk management and referral                                                                                                                                                     |

---

|    |                                            |                                                  |                                                                                 |                                                                                                                                     |                                                                                                                   |
|----|--------------------------------------------|--------------------------------------------------|---------------------------------------------------------------------------------|-------------------------------------------------------------------------------------------------------------------------------------|-------------------------------------------------------------------------------------------------------------------|
| 32 | Price et al. 2017                          | Unknown                                          | Primary care physicians, nurses                                                 | Prevention (iatrogenesis)                                                                                                           | Potentially inappropriate prescriptions in the elderly                                                            |
| 33 | Richardson et al. 2019                     | Unknown                                          | Primary care physicians, nurses                                                 | Therapeutics (prescribing, vaccination)                                                                                             | Sore throat, upper respiratory tract infection                                                                    |
| 34 | Rieckert et al. 2018 and 2019 (2 articles) | PRIMA-eDS tool                                   | Primary care physicians                                                         | Prevention (iatrogenesis)                                                                                                           | Potentially inappropriate prescriptions in the elderly                                                            |
| 35 | Rousseau et al. 2003                       | Unknown                                          | Primary care physicians, nurses, other PCPs (non-physicians)                    | Therapeutics (prescribing, vaccination), global management of chronic disease(s)                                                    | Asthma and angina in adults                                                                                       |
| 36 | Rubin et al. 2006                          | Unknown                                          | Primary care physicians, nurses, other specialists, other PCPs (non-physicians) | Diagnosis, therapeutics (prescribing, vaccination)                                                                                  | Acute respiratory tract infections                                                                                |
| 37 | Silveira et al. 2019                       | TeleHAS                                          | Primary care physicians                                                         | Prevention (disease, test ordering), therapeutics                                                                                   | Cardiovascular risk and hypertension                                                                              |
| 38 | Sukums et al. 2015                         | The QUALMAT eCDSS                                | Other PCPs (non-physicians)                                                     | Therapeutics (prescribing, vaccination)                                                                                             | Antenatal and intrapartum care                                                                                    |
| 39 | Toth-Pal et al. 2008                       | Evibase                                          | Primary care physicians                                                         | Global management of chronic disease(s)                                                                                             | Congestive heart failure                                                                                          |
| 40 | Trafton et al. 2010                        | ATHENA-OT                                        | Primary care physicians, nurses                                                 | Therapeutics (prescribing, vaccination)                                                                                             | Opioid therapy for chronic, noncancer pain                                                                        |
| 41 | Trinkley et al. 2021                       | Unknown                                          | Primary care physicians, other specialists                                      | Therapeutics (prescribing, vaccination)                                                                                             | Heart failure                                                                                                     |
| 42 | Wan et al. 2012                            | Unknown                                          | Primary care physicians, nurses                                                 | Global management of chronic disease(s)                                                                                             | Diabetes (T2)                                                                                                     |
| 43 | Williams et al. 2016                       | Pediatric Cardiovascular Risk Reduction CDS Tool | Primary care physicians                                                         | Prevention (disease, test ordering)                                                                                                 | Pediatric cardiovascular risk management                                                                          |
| 44 | Wilson et al. 2007                         | EMPOWER                                          | Primary care physicians                                                         | Prevention (disease, test ordering), therapeutics (prescribing, vaccination)                                                        | Cardiovascular risk and hypertension                                                                              |
| 45 | Zheng et al. 2005                          | Clinical Reminder System (CRS)                   | Primary care residents                                                          | Prevention (iatrogenesis, disease, test ordering), therapeutics (prescribing, vaccination), global management of chronic disease(s) | Diabetes (T2), hyperlipidemia, steroid-induced osteoporosis, influenza, pneumonia, breast cancer, cervical cancer |

---

## Supplemental Appendix 2C. CDSS knowledge base

| Study                                         | CDSS Name                                     | Knowledge-based CDSS | Updates of the knowledge database | Cites the strength of evidence | Provides links to the sources of recommendations | Provides educational materials to assist patients in shared decision-making |
|-----------------------------------------------|-----------------------------------------------|----------------------|-----------------------------------|--------------------------------|--------------------------------------------------|-----------------------------------------------------------------------------|
| 1 Abimbola et al. 2019                        | HealthTracker                                 | Yes                  | Yes                               | Unknown                        | No                                               | Yes                                                                         |
| 2 afKlercker et al. 1998                      | Unknown                                       | Yes                  | Unknown                           | No                             | No                                               | No                                                                          |
| 3 Alagiakrishnan et al. 2016                  | SMART CDS                                     | Yes                  | Unknown                           | Yes                            | Yes                                              | No                                                                          |
| 4 Arts et al. 2018                            | Unknown                                       | Yes                  | Unknown                           | No                             | Yes                                              | No                                                                          |
| 5 Ash et al. 2011                             | Unknown                                       | Yes                  | Yes                               | Unknown                        | Unknown                                          | No                                                                          |
| 6 Bandong et al. 2019                         | My Whiplash Navigator                         | Yes                  | Unknown                           | Unknown                        | Unknown                                          | Yes                                                                         |
| 7 Bessat et al. 2019                          | Registre Electronique des Consultations (REC) | Yes                  | Unknown                           | Unknown                        | Unknown                                          | No                                                                          |
| 8 Bindels et al. 2003                         | GRIF Automated Feedback System                | Yes                  | Unknown                           | Unknown                        | Yes                                              | No                                                                          |
| 9 Curry et al. 2011                           | Decision Support Server                       | Yes                  | No                                | Unknown                        | Yes                                              | No                                                                          |
| 10 Dixon et al. 2013                          | Unknown                                       | Yes                  | No                                | Unknown                        | Yes                                              | No                                                                          |
| 11 Doerr et al. 2014                          | My Family                                     | Yes                  | Unknown                           | Unknown                        | Yes                                              | Yes                                                                         |
| 12 Edelman et al. 2014                        | The Pregnancy and Health Profile (PHP)        | Yes                  | Unknown                           | Unknown                        | Unknown                                          | Yes                                                                         |
| 13 Feldstein et al. 2013                      | Patient Panel-Support Tool (PST)              | Yes                  | Unknown                           | No                             | No                                               | Yes                                                                         |
| 14 Guenter et al. 2019                        | McMaster Pain Assistant (MPA)                 | Yes                  | No                                | No                             | Yes                                              | Yes                                                                         |
| 15 Helldèn et al. 2015                        | The renal button                              | Yes                  | Unknown                           | Unknown                        | Yes                                              | No                                                                          |
| 16 Heselmans et al. 2020, Koskela et al. 2016 | EBMeDS                                        | Yes                  | Yes                               | Yes                            | Yes                                              | No                                                                          |
| 17 Jensen et al. 2019                         | eIMCI                                         | Yes                  | Yes                               | No                             | Unknown                                          | No                                                                          |
| 18 Jenssen et al. 2016                        | Unknown                                       | Yes                  | Yes                               | No                             | Yes                                              | No                                                                          |
| 19 Kempe et al. 2017                          | Immunization information systems              | Yes                  | Unknown                           | Unknown                        | Unknown                                          | No                                                                          |
| 20 LamShinCheung et al. 2020                  | eAMS (Electronic Asthma Management System)    | Yes                  | Yes                               | No                             | No                                               | Yes                                                                         |
| 21 Lemke et al. 2020                          | The Genetic and Wellness Assessment           | Yes                  | Unknown                           | No                             | No                                               | No                                                                          |
| 22 Litvin et al. 2012                         | ABX-TRIP CDSS                                 | Yes                  | No                                | No                             | Yes                                              | Yes                                                                         |
| 23 Litvin et al. 2016                         | Unknown                                       | Yes                  | No                                | Unknown                        | Yes                                              | No                                                                          |
| 24 Lugtenberg et al. 2015 (2 articles)        | NHGDoc                                        | Yes                  | Yes                               | No                             | Unknown                                          | No                                                                          |

|    |                                            |                                                  |     |         |         |         |         |    |
|----|--------------------------------------------|--------------------------------------------------|-----|---------|---------|---------|---------|----|
| 25 | Maia et al. 2016                           | Unknown                                          | Yes | No      | No      | No      | No      | No |
| 26 | Marcolino et al. 2021                      | Unknown                                          | Yes | Yes     | Unknown | Yes     | Unknown |    |
| 27 | Minian et al. 2021                         | Unknown                                          | Yes | Yes     | No      | No      | No      |    |
| 28 | Montini et al. 2013                        | Unknown                                          | Yes | No      | Unknown | No      | No      |    |
| 29 | Pannebakker et al. 2019                    | Unknown                                          | Yes | Unknown | Unknown | Unknown | No      |    |
| 30 | Peiris et al. 2014                         | Unknown                                          | Yes | No      | Unknown | Yes     | Yes     |    |
| 31 | Praveen et al. 2014                        | Unknown                                          | Yes | Yes     | No      | Yes     | No      |    |
| 32 | Price et al. 2017                          | Unknown                                          | Yes | No      | Yes     | Yes     | No      |    |
| 33 | Richardson et al. 2019                     | Unknown                                          | Yes | No      | Unknown | No      | Yes     |    |
| 34 | Rieckert et al. 2018 and 2019 (2 articles) | PRIMA-eDS tool                                   | Yes | Unknown | Unknown | Yes     | No      |    |
| 35 | Rousseau et al. 2003                       | Unknown                                          | Yes | No      | Yes     | Yes     | Yes     |    |
| 36 | Rubin et al. 2006                          | Unknown                                          | Yes | Unknown | Unknown | Unknown | No      |    |
| 37 | Silveira et al. 2019                       | TeleHAS                                          | Yes | Yes     | Unknown | Yes     | No      |    |
| 38 | Sukums et al. 2015                         | The QUALMAT eCDSS                                | Yes | Unknown | Unknown | Unknown | No      |    |
| 39 | Toth-Pal et al. 2008                       | Evibase                                          | Yes | Unknown | Unknown | Yes     | No      |    |
| 40 | Trafton et al. 2010                        | ATHENA-OT                                        | Yes | No      | Unknown | Yes     | No      |    |
| 41 | Trinkley et al. 2021                       | Unknown                                          | Yes | No      | Unknown | Yes     | No      |    |
| 42 | Wan et al. 2012                            | Unknown                                          | Yes | No      | No      | No      | Yes     |    |
| 43 | Williams et al. 2016                       | Pediatric Cardiovascular Risk Reduction CDS Tool | Yes | Unknown | Unknown | Unknown | No      |    |
| 44 | Wilson et al. 2007                         | EMPOWER                                          | Yes | No      | Unknown | Unknown | Yes     |    |
| 45 | Zheng et al. 2005                          | Clinical Reminder System (CRS)                   | Yes | No      | No      | Yes     | No      |    |

## Supplemental Appendix 2D. CDSS interface

| Study | CDSS Name              | Participants trained to the CDSS | EHR integration | Data entry by the PCP | Data entry by the patient | Duplication of data entry | Active or passive | Push or pull | Interruptive or not | Requires reason for over-ride |    |
|-------|------------------------|----------------------------------|-----------------|-----------------------|---------------------------|---------------------------|-------------------|--------------|---------------------|-------------------------------|----|
| 1     | Abimbola et al. 2019   | HealthTracker                    | No              | Partially integrated  | During the encounter      | No                        | No                | Active       | Pull                | Not interruptive              | No |
| 2     | afKlercker et al. 1998 | Unknown                          | Yes             | Not integrated        | During the encounter      | No                        | Yes               | Passive      | Pull                | Not interruptive              | No |

|    |                                            |                                               |         |                      |                      |                            |     |                    |      |                                                                                       |         |
|----|--------------------------------------------|-----------------------------------------------|---------|----------------------|----------------------|----------------------------|-----|--------------------|------|---------------------------------------------------------------------------------------|---------|
| 3  | Alagiakrishnan et al. 2016                 | SMART CDS                                     | Yes     | Fully integrated     | During the encounter | No                         | No  | Active and Passive | Pull | Interruptive                                                                          | Yes     |
| 4  | Arts et al. 2018                           | Unknown                                       | Yes     | Partially integrated | During the encounter | No                         | Yes | Active             | Pull | Not interruptive                                                                      | Yes     |
| 5  | Ash et al. 2011                            | Unknown                                       | Yes     | Fully integrated     | During the encounter | No                         | No  | Active and Passive | Pull | Interruptive and not interruptive (depending on what aspect of the CDSS is triggered) | No      |
| 6  | Bandong et al. 2019                        | My Whiplash Navigator                         | Yes     | Not integrated       | During the encounter | Yes - before the encounter | Yes | Passive            | Pull | Not interruptive                                                                      | No      |
| 7  | Bessat et al. 2019                         | Registre Electronique des Consultations (REC) | Yes     | Not integrated       | During the encounter | No                         | Yes | Passive            | Pull | Not interruptive                                                                      | No      |
| 8  | Bindels et al. 2003                        | GRIF Automated Feedback System                | Unknown | Partially integrated | During the encounter | No                         | Yes | Active             | Pull | Interruptive                                                                          | Yes     |
| 9  | Curry et al. 2011                          | Decision Support Server                       | Yes     | Fully integrated     | During the encounter | No                         | No  | Passive            | Pull | Interruptive                                                                          | Unknown |
| 10 | Dixon et al. 2013                          | Unknown                                       | Yes     | Fully integrated     | During the encounter | No                         | No  | Active             | Pull | Not interruptive                                                                      | No      |
| 11 | Doerr et al. 2014                          | My Family                                     | Yes     | Fully integrated     | No                   | Yes - before the encounter | No  | Passive            | Pull | Not interruptive                                                                      | No      |
| 12 | Edelman et al. 2014                        | The Pregnancy and Health Profile (PHP)        | Yes     | Not integrated       | No                   | Yes - before the encounter | Yes | Passive            | Pull | Not interruptive                                                                      | No      |
| 13 | Feldstein et al. 2013                      | Patient Panel-Support Tool (PST)              | Yes     | Partially integrated | During the encounter | No                         | No  | Passive            | Pull | Not interruptive                                                                      | No      |
| 14 | Guenter et al. 2019                        | McMaster Pain Assistant (MPA)                 | Yes     | Fully integrated     | During the encounter | No                         | No  | Passive            | Pull | Not interruptive                                                                      | Unknown |
| 15 | Helldèn et al. 2015                        | The renal button                              | Yes     | Fully integrated     | During the encounter | No                         | No  | Active             | Pull | Not interruptive                                                                      | No      |
| 16 | Heselmans et al. 2020, Koskela et al. 2016 | EBMeDS                                        | Yes     | Fully integrated     | During the encounter | No                         | No  | Active             | Pull | Interruptive                                                                          | No      |
| 17 | Jensen et al. 2019                         | eMCI                                          | Yes     | Fully integrated     | During the encounter | No                         | No  | Active             | Pull | Interruptive                                                                          | No      |
| 18 | Jenssen et al. 2016                        | Unknown                                       | Yes     | Fully integrated     | During the encounter | No                         | Yes | Active             | Pull | Not interruptive                                                                      | No      |
| 19 | Kempe et al. 2017                          | Immunization information systems              | No      | Not integrated       | During the encounter | No                         | Yes | Passive            | Pull | Not interruptive                                                                      | No      |
| 20 | LamShinCheung et al. 2020                  | eAMS (Electronic Asthma Management System)    | Yes     | Fully integrated     | During the encounter | Yes - before the encounter | No  | Active             | Pull | Interruptive                                                                          | No      |

---

|    |                                            |                                                  |         |                      |                                     |                            |     |         |         |                  |         |
|----|--------------------------------------------|--------------------------------------------------|---------|----------------------|-------------------------------------|----------------------------|-----|---------|---------|------------------|---------|
| 21 | Lemke et al. 2020                          | The Genetic and Wellness Assessment              | Unknown | Fully integrated     | During the encounter                | Yes - before the encounter | No  | Active  | Unknown | Unknown          | Unknown |
| 22 | Litvin et al. 2012                         | ABX-TRIP CDSS                                    | Yes     | Fully integrated     | During the encounter                | No                         | No  | Passive | Pull    | Not interruptive | No      |
| 23 | Litvin et al. 2016                         | Unknown                                          | Yes     | Fully integrated     | During the encounter                | No                         | No  | Passive | Pull    | Not interruptive | No      |
| 24 | Lugtenberg et al. 2015 (2 articles)        | NHGDdoc                                          | Yes     | Fully integrated     | During the encounter                | No                         | No  | Passive | Pull    | Not interruptive | No      |
| 25 | Maia et al. 2016                           | Unknown                                          | Yes     | Not integrated       | During the encounter                | No                         | Yes | Passive | Pull    | Not interruptive | Unknown |
| 26 | Marcolino et al. 2021                      | Unknown                                          | Yes     | Not integrated       | During the encounter                | No                         | Yes | Passive | Pull    | Not interruptive | No      |
| 27 | Minian et al. 2021                         | Unknown                                          | Yes     | Not integrated       | During the encounter                | No                         | No  | Passive | Pull    | Interruptive     | No      |
| 28 | Montini et al. 2013                        | Unknown                                          | Yes     | Not integrated       | During the encounter                | No                         | Yes | Passive | Pull    | Not interruptive | No      |
| 29 | Pannebakker et al. 2019                    | Unknown                                          | Yes     | Fully integrated     | During the encounter                | No                         | No  | Passive | Pull    | Not interruptive | No      |
| 30 | Peiris et al. 2014                         | Unknown                                          | Unknown | Not integrated       | During the encounter                | No                         | Yes | Passive | Pull    | Not interruptive | No      |
| 31 | Praveen et al. 2014                        | Unknown                                          | Yes     | Not integrated       | During the encounter                | No                         | No  | Passive | Pull    | Not interruptive | No      |
| 32 | Price et al. 2017                          | Unknown                                          | Yes     | Fully integrated     | During the encounter                | No                         | No  | Active  | Pull    | Not interruptive | No      |
| 33 | Richardson et al. 2019                     | Unknown                                          | Unknown | Fully integrated     | During the encounter                | No                         | No  | Active  | Pull    | Interruptive     | No      |
| 34 | Rieckert et al. 2018 and 2019 (2 articles) | PRIMA-eDS tool                                   | Yes     | Not integrated       | Outside and/or during the encounter | No                         | Yes | Passive | Pull    | Not interruptive | No      |
| 35 | Rousseau et al. 2003                       | Unknown                                          | Yes     | Fully integrated     | During the encounter                | No                         | No  | Active  | Pull    | Interruptive     | No      |
| 36 | Rubin et al. 2006                          | Unknown                                          | Yes     | Not integrated       | During the encounter                | No                         | Yes | Passive | Pull    | Not interruptive | No      |
| 37 | Silveira et al. 2019                       | TeleHAS                                          | No      | Not integrated       | Outside and/or during the encounter | No                         | Yes | Passive | Pull    | Not interruptive | No      |
| 38 | Sukums et al. 2015                         | The QUALMAT eCDSS                                | Yes     | Not integrated       | During the encounter                | No                         | Yes | Passive | Pull    | Not interruptive | No      |
| 39 | Toth-Pal et al. 2008                       | Evibase                                          | Yes     | Not integrated       | Outside and/or during the encounter | No                         | Yes | Passive | Pull    | Not interruptive | Unknown |
| 40 | Trafton et al. 2010                        | ATHENA-OT                                        | Yes     | Fully integrated     | Outside and/or during the encounter | No                         | No  | Active  | Pull    | Interruptive     | No      |
| 41 | Trinkley et al. 2021                       | Unknown                                          | Yes     | Fully integrated     | During the encounter                | No                         | No  | Active  | Push    | Interruptive     | Yes     |
| 42 | Wan et al. 2012                            | Unknown                                          | No      | Partially integrated | During the encounter                | No                         | Yes | Active  | Pull    | Not interruptive | No      |
| 43 | Williams et al. 2016                       | Pediatric Cardiovascular Risk Reduction CDS Tool | No      | Not integrated       | During the encounter                | No                         | Yes | Passive | Pull    | Not interruptive | No      |
| 44 | Wilson et al. 2007                         | EMPOWER                                          | Yes     | Partially integrated | During the encounter                | No                         | No  | Passive | Pull    | Not interruptive | Unknown |

|    |                   |                                |     |                      |                      |    |     |         |      |                  |    |
|----|-------------------|--------------------------------|-----|----------------------|----------------------|----|-----|---------|------|------------------|----|
| 45 | Zheng et al. 2005 | Clinical Reminder System (CRS) | Yes | Partially integrated | During the encounter | No | Yes | Passive | Pull | Not interruptive | No |
|----|-------------------|--------------------------------|-----|----------------------|----------------------|----|-----|---------|------|------------------|----|

---

**Supplemental Table 2. Quality assessment of the included studies (QuADS criteria)**

|    |                                  | QuADS criteria |   |   |   |    |    |    |    |    |    |    |    |    |
|----|----------------------------------|----------------|---|---|---|----|----|----|----|----|----|----|----|----|
|    |                                  | 1              | 2 | 3 | 4 | 5  | 6  | 7  | 8  | 9  | 10 | 11 | 12 | 13 |
| 1  | Abimbola et al. 2019             | C              | M | M | C | VS | C  | C  | C  | VS | NM | M  | C  | M  |
| 2  | afKlercker et al. 1998           | M              | C | C | C | C  | C  | C  | C  | NM | VS | C  | NM | M  |
| 3  | Alagiakrishnan et al. 2016       | C              | C | M | C | NM | NM | M  | M  | M  | NM | M  | C  | C  |
| 4  | Arts et al. 2018                 | C              | C | C | C | M  | C  | C  | C  | C  | NM | M  | M  | C  |
| 5  | Ash et al. 2011                  | C              | C | C | M | M  | M  | M  | M  | VS | NM | C  | C  | NM |
| 6  | Bandong et al. 2019              | C              | C | C | C | C  | NM | M  | C  | C  | NM | M  | C  | M  |
| 7  | Bessat et al. 2019               | C              | C | C | C | M  | NM | C  | C  | VS | VS | M  | VS | M  |
| 8  | Bindels et al. 2003              | C              | C | M | C | NM | M  | C  | M  | C  | M  | C  | C  | M  |
| 9  | Curry et al. 2011                | C              | M | C | M | VS | NM | M  | VS | C  | NM | M  | NM | NM |
| 10 | Dixon et al. 2013                | C              | C | C | M | VS | NM | VS | M  | VS | VS | M  | M  | M  |
| 11 | Doerr et al. 2014                | C              | C | C | C | C  | M  | C  | C  | NM | M  | M  | VS | C  |
| 12 | Edelman et al. 2014              | C              | C | C | M | M  | NM | M  | C  | C  | NM | M  | NM | C  |
| 13 | Feldstein et al. 2013            | C              | C | C | C | C  | M  | C  | C  | C  | VS | C  | NM | M  |
| 14 | Guenther et al. 2019             | C              | C | C | C | M  | C  | C  | M  | M  | VS | C  | C  | M  |
| 15 | Helldèn et al. 2015              | C              | C | M | C | VS | C  | C  | M  | C  | VS | C  | C  | C  |
| 16 | Heselmans et al. 2020            | C              | M | C | M | VS | VS | M  | M  | C  | C  | M  | NM | C  |
| 17 | Jensen et al. 2019               | C              | C | C | C | M  | NM | M  | C  | M  | NM | M  | C  | C  |
| 18 | Jenssen et al. 2016              | C              | C | C | C | NM | M  | VS | M  | VS | NM | M  | C  | M  |
| 19 | Kempe et al. 2017                | C              | C | C | M | C  | C  | M  | C  | C  | NM | M  | C  | M  |
| 20 | Koskela et al. 2016              | C              | C | C | C | C  | NM | M  | C  | M  | NM | M  | NM | C  |
| 21 | LamShinCheung et al. 2020        | C              | C | C | M | VS | NM | M  | C  | C  | NM | M  | C  | M  |
| 22 | Lemke et al. 2020                | C              | C | C | C | C  | C  | C  | C  | VS | M  | C  | C  | C  |
| 23 | Litvin et al. 2012               | C              | C | C | C | NM | M  | C  | M  | C  | NM | C  | C  | M  |
| 24 | Litvin et al. 2016               | C              | C | C | C | NM | M  | C  | M  | C  | NM | M  | NM | C  |
| 25 | Lugtenberg, Pasveer et al. 2015  | C              | C | C | C | C  | C  | C  | C  | C  | C  | C  | NM | M  |
| 26 | Lugtenberg, Weeninck et al. 2015 | C              | C | C | C | M  | M  | M  | C  | C  | M  | M  | NM | C  |
| 27 | Maia et al. 2016                 | C              | C | C | M | M  | NM | M  | VS | M  | NM | NM | C  | M  |
| 28 | Marcolino et al. 2021            | C              | C | C | C | VS | VS | C  | M  | M  | NM | M  | C  | M  |

|    |                         |   |   |    |   |    |    |   |    |    |    |    |    |    |
|----|-------------------------|---|---|----|---|----|----|---|----|----|----|----|----|----|
| 29 | Minian et al. 2021      | C | C | C  | C | C  | C  | C | C  | C  | C  | C  | NM | C  |
| 30 | Montini et al. 2013     | C | M | C  | C | VS | M  | M | M  | M  | NM | M  | C  | VS |
| 31 | Pannebakker et al. 2019 | C | C | C  | C | C  | C  | C | C  | VS | M  | C  | C  | M  |
| 32 | Peiris et al. 2014      | C | C | C  | C | VS | M  | C | VS | VS | M  | C  | C  | VS |
| 33 | Praveen et al. 2014     | C | C | C  | C | VS | C  | C | C  | NM | M  | C  | C  | VS |
| 34 | Price et al. 2017       | C | C | C  | C | C  | VS | M | VS | C  | NM | M  | NM | M  |
| 35 | Richardson et al. 2019  | C | C | C  | C | C  | NM | C | M  | VS | C  | C  | NM | C  |
| 36 | Rieckert et al. 2018    | C | C | C  | C | C  | NM | M | C  | M  | M  | C  | NM | C  |
| 37 | Rieckert et al. 2019    | C | C | C  | C | M  | C  | C | C  | C  | C  | C  | NM | C  |
| 38 | Rousseau et al. 2003    | C | M | C  | C | C  | C  | C | C  | M  | NM | NM | NM | M  |
| 39 | Rubin et al. 2006       | C | C | C  | M | VS | NM | M | VS | C  | NM | M  | NM | M  |
| 40 | Silveira et al. 2019    | C | C | C  | C | VS | NM | C | VS | C  | NM | M  | C  | NM |
| 41 | Sukums et al. 2015      | C | C | C  | C | M  | M  | C | C  | VS | M  | C  | NM | M  |
| 42 | Toth-Pal et al. 2008    | C | C | C  | C | M  | VS | C | C  | C  | C  | C  | NM | M  |
| 43 | Trafton et al. 2010     | C | M | C  | C | VS | NM | C | M  | VS | NM | M  | C  | M  |
| 44 | Trinkley et al. 2021    | C | C | C  | C | M  | VS | M | M  | VS | VS | C  | C  | C  |
| 45 | Wan et al. 2012         | C | C | C  | C | M  | NM | C | C  | C  | NM | C  | NM | C  |
| 46 | Williams et al. 2016    | C | C | C  | M | VS | NM | M | M  | VS | C  | M  | NM | C  |
| 47 | Wilson et al. 2007      | C | C | C  | C | VS | NM | M | M  | M  | NM | M  | NM | VS |
| 48 | Zheng et al. 2005       | C | C | VS | C | M  | VS | C | VS | VS | C  | C  | NM | VS |

C: complete; M: moderately; VS: very slightly; NM: no mention at all

1: Theoretical or conceptual underpinning to the research

2: Statement of research aim(s)

3: Clear description of research settings and target population

4: The study design is appropriate to address the stated research aim/s

5: Appropriate sampling to address the research aim/s

6: Rationale for choice of data collection tool/s

7: The format and content of data collection tool is appropriate to address the stated research aim/s

8: Description of data collection procedure

9: Recruitment data provided

10: Justification for analytic method selected

11: The method of analysis was appropriate to answer the research aim/s

12: Evidence that the research stakeholders have been considered in research design or conduct.

13: Strengths and limitations critically discussed

**Supplemental Table 3. Methodological characteristics of included studies**

| <b>Studies</b><br>n=48            | <b>Data collection</b>                                                                                      | <b>Evaluation framework</b>                            | <b>Number of interviewed participants</b>                                                                                                 |
|-----------------------------------|-------------------------------------------------------------------------------------------------------------|--------------------------------------------------------|-------------------------------------------------------------------------------------------------------------------------------------------|
| <b>Abimbola et al. 2019</b>       | Quantitative (cross-sectional survey)<br>Qualitative (focus group discussions)                              | NASSS <sup>1</sup> framework                           | Unknown                                                                                                                                   |
| <b>af Klercker et al. 1998</b>    | Qualitative (focus group)                                                                                   | None                                                   | 1 primary care physician, 4 nurses                                                                                                        |
| <b>Alagiakrishnan et al. 2016</b> | Quantitative (cross-sectional survey)<br>Qualitative (semi-structured interviews)                           | None                                                   | 6 primary care physicians, 2 geriatric medicine specialists                                                                               |
| <b>Arts et al. 2018</b>           | Quantitative (cross-sectional survey)<br>Qualitative (focus group discussions)                              | UTAUT <sup>2</sup> framework                           | 34 primary care physicians                                                                                                                |
| <b>Ash et al. 2011</b>            | Qualitative (semi-structured interviews)                                                                    | Socio-Technical Model of Health Information Technology | 18 primary care physicians, 14 other specialists, 4 staff members                                                                         |
| <b>Bandong et al. 2019</b>        | Quantitative (cross-sectional survey)<br>Qualitative (focus group discussions)                              | NSW <sup>3</sup> Translational Research Framework      | 24 primary care physicians, 13 other specialists, 60 PCP students                                                                         |
| <b>Bessat et al. 2019</b>         | Qualitative (in-depth interviews and focus group discussions)                                               | None                                                   | 21 health workers (non-physicians)                                                                                                        |
| <b>Bindels et al. 2003</b>        | Quantitative (longitudinal survey)<br>Qualitative (in-depth interviews)                                     | IBM computer usability satisfaction questionnaire      | 11 primary care physicians                                                                                                                |
| <b>Curry et al. 2011</b>          | Quantitative (cross-sectional survey, log data)<br>Qualitative (semi-structured interviews)                 | None                                                   | 19 primary care physicians                                                                                                                |
| <b>Dixon et al. 2013</b>          | Quantitative (log data) and Qualitative (meeting minutes)                                                   | None                                                   | 3 primary care physicians                                                                                                                 |
| <b>Doerr et al. 2014</b>          | Quantitative (cross-sectional survey)<br>Qualitative (semi-structured interviews)                           | CFIR <sup>4</sup> framework                            | 4 primary care physicians, 4 other specialists, 2 nurses                                                                                  |
| <b>Edelman et al. 2014</b>        | Quantitative (longitudinal survey)<br>Qualitative (semi-structured interviews and open questions in survey) | None                                                   | 11 primary care physicians, 10 primary care residents                                                                                     |
| <b>Feldstein et al. 2013</b>      | Qualitative (in-depth interview)                                                                            | None                                                   | 17 primary care physicians, 4 nurse practitioners or physician assistants, 11 medical assistants, 20 other managerial staff               |
| <b>Guenter et al. 2019</b>        | Quantitative (longitudinal survey)<br>Qualitative (focus group discussions)                                 | Pathman awareness-to-adherence model                   | 10 primary care physicians (4 family practitioners, 6 obstetrics-gynecology physicians), 10 primary care residents, 3 nurse practitioners |
| <b>Helldén et al. 2015</b>        | Qualitative (focus group discussions)                                                                       | Technology Acceptance Model (TAM)                      | 7 primary care physicians                                                                                                                 |
| <b>Heselmans et al. 2020</b>      | Quantitative (cross-sectional survey)                                                                       | None                                                   | 14 primary care physicians                                                                                                                |
| <b>Jensen et al. 2019</b>         | Quantitative (log data)                                                                                     | None                                                   | 32 IMCI practitioners (professional nurses who have been trained in primary healthcare), 6 operational                                    |

|                                    |                                                                                   |                                                   |                                                                                                           |
|------------------------------------|-----------------------------------------------------------------------------------|---------------------------------------------------|-----------------------------------------------------------------------------------------------------------|
|                                    | Qualitative (focus group discussions and in-depth interview)                      |                                                   | managers (senior nurses appointed to oversee the day-to-day operations)                                   |
| <b>Jenssen et al. 2016</b>         | Quantitative (log data, cross-sectional survey)                                   | IBM computer usability satisfaction questionnaire | 17 primary care physicians                                                                                |
|                                    | Qualitative (focus group discussions and open questions in survey)                |                                                   |                                                                                                           |
| <b>Kempe et al. 2017</b>           | Quantitative (cross-sectional survey)                                             | None                                              | 907 primary care physicians (325 pediatricians, 310 family practitioners, 272 general internists)         |
| <b>Koskela et al. 2016</b>         | Qualitative (focus group discussions)                                             | None                                              | 9 primary care physicians, 12 nurses                                                                      |
| <b>Lam Shin Cheung et al. 2020</b> | Quantitative (cross-sectional survey)<br>Qualitative (open questions in survey)   | System Usability Scale (SUS)                      | 18 primary care physicians, 1 nurse practitioner                                                          |
| <b>Lemke et al. 2020</b>           | Qualitative (semi structured interviews)                                          | None                                              | 24 primary care physicians (12 general internal medicine, 8 family medicine, and 4 obstetrics-gynecology) |
| <b>Litvin et al. 2012</b>          | Quantitative (log data)<br>Qualitative (semi structured interviews)               | None (based on previous findings)                 | 27 primary care physicians, 6 nurse practitioners, 6 physician's assistants                               |
| <b>Litvin et al. 2016</b>          | Quantitative (log data)<br>Qualitative (semi structured interviews)               | None (based on previous findings)                 | 25 primary care physicians and 15 midlevel providers                                                      |
| <b>Lugtenberg et al. 2015</b>      | Qualitative (focus group discussions)                                             | None (based on previous findings)                 | 15 primary care physicians, 4 primary care residents, 5 practice nurses                                   |
| <b>Lugtenberg et al. 2015</b>      | Quantitative (cross-sectional survey)                                             | None (based on previous findings)                 | 112 primary care physicians, 52 practice nurses                                                           |
| <b>Maia et al. 2016</b>            | Quantitative (cross-sectional survey)<br>Qualitative (open questions in survey)   | None                                              | 2 primary care physicians, 10 nurses                                                                      |
| <b>Marcolino et al. 2021</b>       | Quantitative (cross-sectional survey)<br>Qualitative (focus group discussions)    | None (based on previous findings)                 | 25 primary care physicians, 44 nurses, 27 other PCPs (non-physicians)                                     |
| <b>Minian et al. 2021</b>          | Qualitative (semi structured interviews)                                          | Hexagon Tool framework                            | 13 nurses, 4 pharmacists, 7 other PCPs (non-physicians)                                                   |
| <b>Montini et al. 2013</b>         | Quantitative (log data)<br>Qualitative (semi structured interviews)               | Technology Acceptance Model (TAM)                 | 10 associate student dentists                                                                             |
| <b>Pannebakker et al. 2019</b>     | Qualitative (semi structured interviews)                                          | CFIR <sup>4</sup> framework                       | 14 primary care physicians                                                                                |
| <b>Peiris et al. 2014</b>          | Quantitative (log data)<br>Qualitative (semi structured interviews)               | None                                              | 20 primary care physicians                                                                                |
| <b>Praveen et al. 2014</b>         | Quantitative (cross-sectional survey)<br>Qualitative (semi structured interviews) | COM-B <sup>5</sup> theory of behavior change      | 3 primary care physicians, 35 ASHAs (accredited social health activist),                                  |
| <b>Price et al. 2017</b>           | Quantitative (log data)<br>Qualitative (semi structured interviews)               | None                                              | 5 primary care physicians                                                                                 |

|                               |                                                                                          |                                                                                                                |                                                              |
|-------------------------------|------------------------------------------------------------------------------------------|----------------------------------------------------------------------------------------------------------------|--------------------------------------------------------------|
| <b>Richardson et al. 2019</b> | Qualitative (semi structured interviews)                                                 | None                                                                                                           | 3 primary care physicians                                    |
| <b>Rieckert et al. 2018</b>   | Qualitative (semi structured interviews)                                                 | None                                                                                                           | 21 primary care physicians                                   |
| <b>Rieckert et al. 2019</b>   | Quantitative (cross-sectional survey)                                                    | None                                                                                                           | 161 primary care physicians                                  |
| <b>Rousseau et al. 2003</b>   | Qualitative (semi structured interviews)                                                 | None                                                                                                           | 8 primary care physicians, 3 nurses, and 2 practice managers |
| <b>Rubin et al. 2006</b>      | Quantitative (cross-sectional survey)<br>Qualitative (open questions in survey)          | None                                                                                                           | 65 primary care physicians                                   |
| <b>Silveira et al. 2019</b>   | Quantitative (longitudinal survey)<br>Qualitative (semi structured interviews)           | None                                                                                                           | 10 primary care physicians                                   |
| <b>Sukums et al. 2015</b>     | Quantitative (longitudinal survey)<br>Qualitative (semi structured interviews)           | FITT <sup>6</sup> framework                                                                                    | 56 other PCPs (non-physicians)                               |
| <b>Toth-Pal et al. 2008</b>   | Quantitative (log data)<br>Qualitative (semi structured interviews)                      | None                                                                                                           | 5 primary care physicians                                    |
| <b>Trafton et al. 2010</b>    | Quantitative (longitudinal survey, log data)<br>Qualitative (semi structured interviews) | System Usability Scale (SUS) and Center for Health Care Evaluation adapted provider satisfaction questionnaire | 11 primary care physicians, 1 nurse practitioner             |
| <b>Trinkley et al. 2021</b>   | Qualitative (semi structured interviews)                                                 | Modified System Usability Scale (SUS)                                                                          | 21 primary care physicians                                   |
| <b>Wan et al. 2012</b>        | Qualitative (semi structured interviews)                                                 | None                                                                                                           | 15 primary care physicians, 2 practice nurses                |
| <b>Williams et al. 2016</b>   | Quantitative (cross-sectional survey)<br>Qualitative (feedback minutes)                  | System Usability Scale (SUS)                                                                                   | 14 primary care physicians                                   |
| <b>Wilson et al. 2007</b>     | Qualitative (semi structured interviews)                                                 | None                                                                                                           | 5 primary care physicians                                    |
| <b>Zheng et al. 2005</b>      | Quantitative (log data)<br>Qualitative (semi structured interviews)                      | IBM computer usability satisfaction questionnaire                                                              | 16 primary care residents                                    |

---

1: Framework for theorizing and evaluating Nonadoption, Abandonment, and challenges to the Scale-Up, Spread, and Sustainability of health and care technologies

2: Unified Theory of Acceptance and Use of Technology

3: New South Wales

4: Consolidated Framework for Implementation Research

5: Capability, Opportunity, and Motivation as three key factors capable of changing behavior (B)

6: Fit between Individual, Task and Technology

## Supplemental Appendix 3. Complete list of identified main barriers and facilitators, and explanatory elements, according to the HOT-fit framework

### Classification of inductive codes in the HOT-fit framework [n CDSSs]

---

#### Human [n=41]

##### System use [n=39]

##### Attitude [n=21]

- (-) PCPs don't need help with the targeted health issue [n=8]
- (-) Lack of engagement from PCPs (inertia of previous practice) [n=8]
- (-) Concerns about the explainability of CDSS recommendations [n=5]
- (-) Fear of patient opinion [n=4]
- (-) Stress associated with a new task [n=2]
- (-) Fear of data loss in case of breakdowns [n=1]
- (+) PCP commitment [n=1]

##### Expectations or belief [n=12]

- (-) Using CDSSs reduces PCPs' expertise and may lead to "cookbook medicine" [n=6]
  - The recommendation should not be directive but give attention so that they facilitate PCPs' own judgment [n=1]
- (-) CDSS are mostly useful to less experienced PCPs [n=5]
- (-) Creating a specific to-do list would be useful to later reassess recommendations not completed during the medical consultation [n=2]
- (-) Not following CDSS recommendations may led PCPs to legal issues [n=2]
- (-) Concerns regarding the misuse of data by third parties (health inspectorate or health insurance companies) [n=1]

##### Knowledge and expertise [n=7]

- (-) Lack of computer skills [n=7]

##### Level of use [n=5]

- (-) Don't feel qualified to perform CDSS recommendations [n=3]
- (-) Old age [n=2]

##### Motivation to use [n=18]

- (-) Technical problems hinders the motivation to use the CDSS [n=9]
- (+) Patients' perceived usefulness of the CDSS increases PCPs' motivation to use it [n=7]
- (-) Ask for financial compensation to CDSS use [n=7]
  - Need to reward support staff for their productivity with the CDSS [n=1]
- (+) Using CDSSs is a source of motivation to provide better care (PCPs feels more advanced compared to others) [n=3]
- (-) No motivational information as to why it is important to use the CDSS [n=2]
- (+) Positive feedback is appreciated by PCPs when they had completed a CDSS's recommended task [n=1]

(-) Positive feedback is wanted by PCPs when they had completed a CDSS's recommended task [n=1]

(-) Lack of job security [n=1]

**Nature of use** [n=1]

(-) Depending on the setting, some clinical information requested by the CDSS is too difficult to obtain [n=1]

**Purpose of use** [n=3]

(-) CDSS's targeted health care issue represents only a small part of the PCPs' everyday concerns [n=2]

(+) CDSS opens teaching opportunities for trainees [n=1]

**Report acceptance** [n=15]

(-) Information overload [n=15]

Alert fatigue [n=13]

Lack of concise synthesis of the recommendation [n=7]

**Resistance or reluctance** [n=19]

(-) Conflicts between CDSS recommendations and PCPs expertise or beliefs [n=18]

CDSS recommendations don't reflect the complexity of the situation [n=12]

CDSS recommendations may result in over-referral [n=3]

Concerns about overdiagnosis [n=2]

Perceived shortcomings of evidence-based medicine explain PCP refusal of CDSS recommendations [n=1]

(-) PCPs reluctance due to patient disagreement with CDSS recommendations [n=6]

(-) Conflicts between CDSSs recommendations and local guidelines [n=1]

(-) Too stressful to use the CDSS with the patient present [n=1]

**Training** [n=18]

(-) Training before use is needed [n=11]

PCPs are not aware of customization options [n=2]

Advanced features are unused or not understood, due to lack of training [n=2]

The training session to the CDSS is inadequate or too short [n=4]

(+) Training before use is appreciated [n=10]

(-) Ask for yearly refresher training [n=2]

**User satisfaction** [n=31]

**Decision making satisfaction** [n=0]

**Enjoyment** [n=0]

**Overall satisfaction** [n=7]

- (+) CDSSs increase PCPs satisfaction [n=7]

**Perceived usefulness** [n=24]

- (+) Perceived usefulness of the CDSS [n=23]
- (+) The computerization of decision support is appreciated [n=5]
- (-) Alert content not consistent with the varying needs of different types of PCPs [n=2]

**Satisfaction with specific functions** [n=3]

- (-) CDSS required “extra clicks” [n=1]
- (-) Impossibility of skipping steps [n=1]
- (+) Minimal interruptive alerts [n=1]

**Software satisfaction** [n=12]

- (+) PCPs would continue to use the CDSS [n=9]
- (+) PCPs will recommend the CDSS to colleagues [n=6]

**Net benefits** [n=42]

**Clinical Practice** [n=22]

- (+) CDSS is a way to update your knowledge [n=17]
- (+) CDSS leads to better teamwork in primary care [n=7]
- (+) The CDSS increases PCPs confidence [n=7]
- (+) The CDSS helps the PCP to prepare the encounter [n=4]
- (+) Collecting structured data facilitates follow up of patients [n=2]
- (+) CDSS enables urgent referral pathways [n=1]
- (-) CDSS recommendations were hard to realize [n=1]

**Communication** [n=26]

- (+) The CDSS helps focus on patient education [n=18]
  - CDSS helps to increase patient engagement [n=14]
- (+) CDSS facilitates patient-PCP communication [n=13]
- (-) Negative effect on patient communication [n=7]
- (+) The CDSS facilitated communication between PCPs and other specialists [n=3]
- (+) The CDSS is used by PCPs to legitimate their refusal to prescribe unnecessary tests or medications [n=3]
- (-) Education materials provided to patients are sometimes difficult for them to understand [n=2]

**Decision making quality** [n=25]

- (+) CDSS facilitates decision making [n=22]
  - The CDSS facilitate in treatment decision making [n=10]
  - CDSS is facilitating decision making about referral [n=5]

(-) No real impact on decision making [n=3]

(+) Help PCPs to set priorities for quality improvement [n=2]

**Error reduction** [n=17]

(+) CDSS helps PCPs to identify unrecognized information needs [n=17]

(+) Reduced need for clinical supervision [n=1]

**Perceived effectiveness** [n=25]

(+) Potential to improve the quality of care [n=23]

    CDSS helps to systematize assessment of every patient [n=13]

    Brings primary and secondary preventive care needs to the forefront [n=7]

(+) CDSS helps PCPs to improve guideline adherence [n=11]

(+) The CDSS facilitates patient care management [n=9]

(+) Perceived effectiveness in the personalization of care [n=4]

(-) CDSS did not aid adherence to guidelines [n=1]

**Perceived efficiency** [n=37]

(-) Increased workload during the consultation [n=33]

    Lack of time to use the CDSS during the encounter [n=31]

        Duplication of data collection [n=12]

        Structured data collection takes too much time [n=15]

            Lack of practice in documenting within the structured form in the EHR [n=1]

            Comfort with previous habits without the CDSS [n=1]

Coping strategies:

Increased consultation time [n=14]

    The CDSS increases discussion time with the patient [n=3]

    Using CDSS lengthens the decision-making process [n=1]

    PCPs need additional time using the CDSS outside the consultation [n=8]

Having dedicated CDSS time [n=3]

Scheduling follow up appointments [n=5]

(+) Using CDSS saves time [n=22]

Shortening documentation time [n=8]

Giving a quick patient evaluation from relevant data in patients' EHRs [n=6]

The CDSS enhances visit productivity [n=3]

## **Organization** [n=41]

### **Environment** [n=18]

#### **Competition** [n=2]

(-) Competing obligations (other incentive programs) [n=2]

#### **External communication** [n=0]

#### **Financing source** [n=2]

(-) Cost of the CDSS [n=1]

(-) Lack of funding for trainings, support, or hardware maintenance [n=1]

#### **Government** [n=1]

(+) Benefits from federal meaningful use initiatives [n=1]

#### **Inter-organizational relationship** [n=11]

(-) Difficulty to use the CDSS for patients comanaged by other specialists [n=11]

Information is sometimes missing or not integrated from other external sources (other specialists or hospital data) [n=6]

Disagreement between CDSS recommendations and prescriptions of other specialists [n=2]

(-) No possibility to consult patient data from other practices within the same regional primary care structure [n=2]

#### **Localisation** [n=0]

#### **Politics** [n=0]

(+) Being part of a national project [n=1]

(+) Bottom-up design of the CDSS within an organised regional primary care structure [n=1]

(-) Intellectual property of CDSS's knowledge artifacts translated from guidelines is an obstacle to their customization by PHPs [n=1]

#### **Population served** [n=5]

(-) Patients cannot afford CDSS's proposed care [n=3]

New consultations programmed to discuss about the CDSS may cost too much for patients [n=1]

(-) PCPs think that patients have competing priorities that hinders acceptance of CDSS recommendations [n=3]

## **Structure** [n=39]

### **Autonomy** [n=10]

(+) Producing reports of quality measures through collected data increases the value from the CDSS's use in clinical practice [n=7]

- (-) Data generated by the CDSS can't be used to produce reports of quality measures [n=3]
- (-) Poor availabilities to medication or post referral hinder motivation to use the CDSS [n=3]
  - Frequent running out of stock of medical equipment, supplies, and medicines affected the CDSS use during patient care [n=1]

**Clinical process** [n=35]

- (-) Using CDSS disrupts usual workflow [n=25]
- (+) Natural integration of the CDSS in clinical workflow [n=13]
- (-) There were already protocols or CDSS in place for this issue [n=4]
- (-) No education sheet for patients provided by the CDSS [n=2]
- (+) Data entry by patients prior to the consultation [n=2]

**Communication** [n=4]

- (-) PCPs not informed of disposable CDSSs integrated in the EHR [n=2]
- (+) Collaboration between project and site staff to complete protocols and applications [n=1]
- (+) Regular communication of updates by the clinic manager [n=1]

**Culture** [n=2]

- (+) Structures already engaged in quality improvement work (good operational structure) [n=1]
- (-) The diversity of medical practices involved complicates the development of shared clinical content [n=1]

**Hardware** [n=16]

- (-) Lack of computers or tablets in the structure [n=7]
- (-) Poor internet or wireless connectivity [n=6]
- (-) Malfunctioning computers [n=5]
  - Slowness of the computers [n=2]
- (-) Limited printing capabilities preventing use of POC patient education [n=3]
- (-) Limited battery life (CDSS on tablets) [n=3]
- (-) Screen damage (CDSS on tablets) [n=1]
- (-) Small sized computer screens [n=1]
- (-) Unreliable power supply [n=1]

**Leadership** [n=7]

- (+) Available leadership support [n=6]
  - Identified clinical champion in the facility [n=3]
  - Identified technical champion in the facility [n=4]
- (-) Missing leadership support [n=5]
  - Lack of clinical champion in each facility [n=5]
  - Technical champion is needed [n=3]

**Mediator** [n=1]

(+) Known mediator (e.g., physician association) between the user and the vendor [n=1]

**Medical sponsorship** [n=0]

**Nature (type, size)** [n=5]

(+) CDSS (on tablets) ease access to isolated population [n=1]

(-) Changing to an incompatible EHR [n=1]

(+) Equipment and supplies (medical) available [n=1]

(-) Limitation of the reach of the CDSS for PCPs without access to technology [n=1]

(-) No private space in which patients can complete the questionnaire [n=1]

**Planning** [n=0]

**Strategy management** [n=0]

**Teamwork** [n=19]

(-) Need of more teamwork with other PCPs to help physicians with CDSS's increased workload [n=13]

Physicians fear more the CDSS workload than assistants or nurses [n=4]

CDSS could be an opportunity for increasing interprofessional collaboration [n=1]

Nurses not allowed to code diagnosis [n=1]

(+) Other professionals ease physician's increased workload with the CDSS [n=6]

Expansion of skill set and roles in assisting physicians and patients in meeting care needs [n=3]

(-) Staff turnover [n=3]

(-) CDSS use in teams may lead to conflicts [n=2]

(-) No good communication between physicians and staff about good practice with the CDSS [n=2]

(+) Can manage the CDSS without a technical staff member [n=1]

(-) Staff assistant express apprehension with their new responsibilities [n=1]

(-) Low GP confidence in health workers using the CDSS [n=1]

(-) Unclear expectation at the PCP and support staff level as to who completes what task and how to coordinate work [n=1]

**Top management support** [n=0]

**Technology** [n=45]

**Information quality** [n=40]

**Accuracy** [n=1]

(-) Lack of accuracy of the CDSS recommendations [n=1]

**Completeness** [n=13]

(-) Incompleteness of CDSS' recommendations [n=7]

(+) Completeness of the CDSS [n=4]

(-) Documentation provided in CDSS recommendations is too poor [n=2]

(-) Data collection surveys for patients are not complete enough [n=1]

**Conciseness** [n=6]

(+) Conciseness of the recommendations [n=6]

**Data entry methods** [n=7]

(+) Easy data collection [n=5]

Automatic data entry (retrieval from the EHR) [n=1]

(-) Data entry by patients is hindered by lack of patient understanding of the CDSS questions [n=1]

(-) Some coding is difficult to find [n=1]

**Format** [n=18]

(-) Format of recommendations (length, structure, font colors) [n=13]

(+) Pleasing visual layout [n=12]

(-) CDSS's notifications are phrased too tentatively [n=1]

**Importance** [n=0]

**Legibility** [n=4]

(-) Need for a common vocabulary [n=4]

Terminology used is not understood by PCPs [n=2]

**Relevance** [n=19]

(-) CDSS recommendations are not relevant [n=11]

Conflict between patient-driven acute needs and CDSS-related care needs [n=7]

General recommendations are often irrelevant [n=4]

General recommendations have less impact on GP's decision-making process [n=1]

The CDSS recommendations don't fit with vague complaints [n=1]

Irrelevant alert for different PCP groups (such as for nurses or GPs) [n=1]

(+) CDSS recommendations are relevant [n=11]

**Reliability** [n=17]

(-) Doubtful reliability of the recommendations [n=12]

The reliability of the recommendations depends on the quality and completeness of the information collected [n=11]

(+) CDSS recommendations are reliable [n=9]

General agreement with the validity of CDSS recommendations [n=4]

Full guidelines linked to each recommendation [n=1]

**Timeliness** [n=6]

(-) CDSS recommendations are not displayed at the right time [n=5]

Recommendation appearing after the patient chart was closed or decision was made [n=2]

(+) CDSS recommendations are displayed at the right time [n=1]

(-) CDSS recommendations are not displayed at the right time [n=5]

Recommendation appearing after the patient chart was closed or decision was made [n=2]

(+) CDSS recommendations are displayed at the right time [n=1]

**Usefulness** [n=21]

(+) Information provided is useful for the targeted process of care [n=13]

(-) CDSS recommendations are not helpful [n=8]

The recommendation is sometimes too vague to be useful [n=2]

(+) Educational material for patients is valuable [n=7]

**Service quality** [n=11]

**Assurance** [n=0]

**Empathy** [n=0]

**Follow up service** [n=0]

**Quick responsiveness** [n=0]

**Technical support** [n=11]

(+) Satisfaction with the CDSS service support [n=7]

CDSS technical staff availability [n=6]

(-) Inadequate or delayed user support [n=5]

(+) Periodic auditing enables to detect technical issues before clinician complaints [n=3]

(-) User manual is too long [n=1]

**System quality** [n=45]

**Availability** [n=2]

(+) Tool is consistently available [n=2]

**Data accuracy** [n=7]

(-) No updates of the CDSS [n=4]

(+) EHR's collected data is more accurate [n=2]

(-) Inaccurate collected data in the EHR [n=2]

**Database contents** [n=18]

(-) The CDSS should target more health issues [n=11]

(-) Questioning validity of CDSS's knowledge database [n=7]

PCPs expect the tool's independence from the pharmaceutical industry and being free of commercial advertisements [n=3]

CDSS recommendations went too far in recommending brands [n=1]

(-) No link to guidelines [n=1]

**Ease of learning** [n=9]

(+) Easy to use after a short learning period [n=9]

**Ease of use** [n=39]

(+) The CDSS is user-friendly (ergonomic) [n=30]

No need to switch windows in the EHR while using CDSSs [n=1]

(-) The CDSS is not user-friendly [n=21]

Need to switch windows in the EHR while using CDSSs [n=9]

Location of CDSS recommendations should be changed [n=8]

Need to switch windows between the EHR and the CDSS [n=5]

Difficulty accessing different CDSS functions [n=3]

The recommendation is not displayed at the right place or difficult to find [n=3]

CDSS should be designed to help shared decision making [n=1]

(+) CDSS recommendations are easy to understand [n=9]

(-) Breakdowns requiring restarts [n=4]

(+) Absence of breakdown [n=1]

(-) CDSS recommendations are not easy to understand [n=1]

(+) Gathering a complete assessment within a single device [n=1]

**Efficiency** [n=4]

(+) Allows for quick and easy search and retrieval of information for an individual patient or subgroup of patients [n=4]

**Flexibility** [n=13]

(-) Need of customization options [n=8]

(-) Conflict between usual codes (e.g., diagnostic classification) and codes used by the CDSS = semantic interoperability issue [n=3]

(+) Customization of the CDSS is appreciated [n=3]

**Reliability** [n=2]

(+) PCPs trust the CDSS knowledge database [n=2]

**Resource utilization** [n=0]

**Response time** [n=0]

**Security** [n=3]

(-) Concerns about data security [n=3]

**Technical support** [n=1]

(+) Access to technical support integrated into CDSS [n=1]

**Turnaround time** [n=18]

(-) CDSS slowness [n=16]

CDSS's slowness impairs the interaction with the patient and increases the consultation time [n=5]

(+) CDSS is quick and prompt [n=3]

**Usefulness of system features and functions** [n=33]

(-) CDSS not fully integrated in the EHR [n=14]

A CDSS not fully integrated in the EHR is time consuming and disrupts workflow [n=4]

The most current information collected in the EHR is sometimes not updated in the CDSS [n=3]

(+) Reminder system [n=8]

- (-) Lack of learning capacity of the CDSS [n=6]
- (+) Full integration in the EHR [n=3]
- (-) CDSS fully integrated but integration to be enhanced [n=3]
- (-) Interruptive recommendations hampers clinical workflow [n=3]
- (+) Risk assessment within the CDSS [n=2]
- (+) Possibility to overview patients concerned with specific recommendation through patient registry [n=2]
- (-) No search & find tool [n=2]
- (+) Medication order linked to the advice of the CDSS [n=1]
- (-) No possibility to add photos [n=1]
- (-) Dismiss option encourages dismissal [n=1]
- (-) Passive CDSS [n=1]
- (+) Pull function [n=1]
- (-) Too many login points [n=1]
- (+) Guided mode (preferred over critiquing mode) [n=1]
- (-) Lack of easy and efficient way to document and track patient refusal of services or team effort made [n=1]
- (+) CDSS designed to be independent from internet connection [n=1]
- (+) Asking reason to override the recommendation helps physicians communicate with each other about their practice [n=1]
- (-) Asking reasons for overriding recommendations is defensive medicine and does not contribute to patient care [n=1]

---

(-): barriers; (+): facilitators; [n CDSSs]

**Supplemental Table 4. Number of barriers and facilitators identified per CDSS**

|                                                      | <b>Total<br/>(n/255)</b> | <b>Main barriers<br/>and facilitators<br/>(n/186)</b> | <b>Explanatory<br/>elements<br/>(n/69)</b> |
|------------------------------------------------------|--------------------------|-------------------------------------------------------|--------------------------------------------|
| 1 Abimbola et al. (2019)                             | 64                       | 45                                                    | 19                                         |
| 2 af Klercker et al. (1998)                          | 12                       | 8                                                     | 4                                          |
| 3 Alagiakrishnan et al. (2016)                       | 29                       | 25                                                    | 4                                          |
| 4 Arts et al. (2018)                                 | 34                       | 23                                                    | 11                                         |
| 5 Ash et al. (2011)                                  | 29                       | 21                                                    | 8                                          |
| 6 Bandong et al. (2019)                              | 19                       | 17                                                    | 2                                          |
| 7 Bessat et al. (2019)                               | 48                       | 36                                                    | 12                                         |
| 8 Bindels et al. (2003)                              | 31                       | 22                                                    | 9                                          |
| 9 Curry et al. (2011)                                | 9                        | 8                                                     | 1                                          |
| 10 Dixon et al. (2013)                               | 11                       | 8                                                     | 3                                          |
| 11 Doerr et al. (2014)                               | 46                       | 35                                                    | 11                                         |
| 12 Edelman et al. (2014)                             | 42                       | 28                                                    | 14                                         |
| 13 Feldstein et al. (2013)                           | 87                       | 59                                                    | 28                                         |
| 14 Guenter et al. (2019)                             | 13                       | 9                                                     | 4                                          |
| 15 Helldén et al. (2015)                             | 23                       | 17                                                    | 6                                          |
| 16 Heselmans et al. (2020) and Koskela et al. (2016) | 33                       | 25                                                    | 8                                          |
| 17 Jensen et al (2019)                               | 29                       | 23                                                    | 6                                          |
| 18 Jenssen et al. (2016)                             | 8                        | 7                                                     | 1                                          |
| 19 Kempe et al. (2017)                               | 12                       | 7                                                     | 5                                          |
| 20 Lam Shin Cheung et al. (2020)                     | 25                       | 20                                                    | 5                                          |
| 21 Lemke et al (2020)                                | 37                       | 28                                                    | 9                                          |
| 22 Litvin et al. (2012)                              | 34                       | 23                                                    | 11                                         |
| 23 Litvin et al. (2016)                              | 30                       | 21                                                    | 9                                          |
| 24 Lugtenberg et al. (2015) (2 articles)             | 39                       | 27                                                    | 12                                         |
| 25 Maia et al. (2016)                                | 16                       | 11                                                    | 5                                          |
| 26 Marcolino et al. (2021)                           | 35                       | 25                                                    | 10                                         |
| 27 Minian et al. (2021)                              | 23                       | 17                                                    | 6                                          |
| 28 Montini et al. (2013)                             | 14                       | 10                                                    | 4                                          |
| 29 Pannebakker et al (2019)                          | 22                       | 18                                                    | 4                                          |

|                                 |      |    |    |
|---------------------------------|------|----|----|
| 30 Peiris et al. (2014)         | 17   | 15 | 2  |
| 31 Praveen et al. (2014)        | 26   | 24 | 2  |
| 32 Price et al. (2017)          | 10   | 5  | 5  |
| 33 Richardson et al. (2019)     | 17   | 12 | 5  |
| 34 Rieckert et al. (2018, 2019) | 50   | 37 | 13 |
| 35 Rousseau et al. (2003)       | 42   | 27 | 15 |
| 36 Rubin et al. (2006)          | 15   | 10 | 5  |
| 37 Silveira et al. (2019)       | 33   | 22 | 11 |
| 38 Sukums et al. (2015)         | 48   | 33 | 15 |
| 39 Toth-Pal et al. (2008)       | 33   | 24 | 9  |
| 40 Trafton et al. (2010)        | 32   | 29 | 3  |
| 41 Trinkley et al. (2021)       | 18   | 14 | 4  |
| 42 Wan et al. (2012)            | 49   | 35 | 14 |
| 43 Williams et al. (2016)       | 15   | 11 | 4  |
| 44 Wilson et al. (2007)         | 23   | 20 | 3  |
| 45 Zheng et al (2005)           | 20   | 13 | 7  |
| Mean                            | 28.9 |    |    |

**Supplemental Table 5. Individual impacts of the three HOT-fit factors (human, organization, technology) and the net benefits dimension on the use of each CDSS**

| CDSS ranked by continent of use | Individual impacts (Y facilitators – X barriers) |                             |                           |                             |
|---------------------------------|--------------------------------------------------|-----------------------------|---------------------------|-----------------------------|
|                                 | Human<br>41/45 CDSSs                             | Organization<br>41/45 CDSSs | Technology<br>45/45 CDSSs | Net Benefits<br>42/45 CDSSs |
| <b>North America</b>            |                                                  |                             |                           |                             |
| Alagiakrishnan et al. (2016)    | <b>-2</b> (3 – 5)                                | <b>-2</b> (0 – 2)           | <b>4</b> (6 – 2)          | <b>5</b> (6 – 1)            |
| Ash et al. (2011)               | <b>-2</b> (1 – 3)                                | <b>4</b> (7 – 3)            | <b>-3</b> (1 – 4)         | <b>0</b> (1 – 1)            |
| Curry et al. (2011)             | <b>0</b> (1 – 1)                                 | <b>0</b> (1 – 1)            | <b>-2</b> (0 – 2)         | <b>0</b> (1 – 1)            |
| Dixon et al. (2013)             | (0 – 0)                                          | <b>-2</b> (0 – 2)           | <b>-4</b> (1 – 5)         | (0 – 0)                     |
| Doerr et al. (2014)             | <b>-3</b> (1 – 4)                                | <b>2</b> (2 – 0)            | <b>1</b> (8 – 7)          | <b>11</b> (12 – 1)          |
| Edelman et al. (2014)           | <b>-2</b> (1 – 3)                                | <b>1</b> (4 – 3)            | <b>-3</b> (3 – 6)         | <b>4</b> (6 – 2)            |
| Feldstein et al. (2013)         | <b>1</b> (8 – 7)                                 | <b>-1</b> (4 – 5)           | <b>4</b> (14 – 10)        | <b>9</b> (10 – 1)           |
| Guenter et al. (2019)           | <b>-3</b> (0 – 3)                                | (0 – 0)                     | <b>2</b> (3 – 1)          | <b>2</b> (2 – 0)            |
| Jenssen et al. (2016)           | <b>2</b> (2 – 0)                                 | (0 – 0)                     | <b>0</b> (2 – 2)          | <b>1</b> (1 – 0)            |
| Kempe et al. (2017)             | <b>-1</b> (0 – 1)                                | <b>-2</b> (0 – 2)           | <b>-3</b> (0 – 3)         | <b>-1</b> (0 – 1)           |
| Lam Shin Cheung et al. (2020)   | <b>-1</b> (0 – 1)                                | <b>-4</b> (0 – 4)           | <b>5</b> (6 – 1)          | <b>6</b> (7 – 1)            |
| Lemke et al (2020)              | <b>-6</b> (1 – 7)                                | <b>-4</b> (0 – 4)           | <b>-7</b> (0 – 7)         | <b>7</b> (8 – 1)            |
| Litvin et al. (2012)            | <b>-1</b> (1 – 2)                                | <b>-4</b> (1 – 5)           | <b>-1</b> (3 – 4)         | <b>3</b> (5 – 2)            |
| Litvin et al. (2016)            | <b>-3</b> (1 – 4)                                | <b>-3</b> (1 – 4)           | <b>2</b> (4 – 2)          | <b>5</b> (5 – 0)            |
| Minian et al. (2021)            | <b>-3</b> (2 – 5)                                | <b>-3</b> (0 – 3)           | <b>1</b> (3 – 2)          | <b>0</b> (1 – 1)            |
| Montini et al. (2013)           | (0 – 0)                                          | <b>-4</b> (0 – 4)           | <b>0</b> (1 – 1)          | <b>2</b> (3 – 1)            |
| Price et al. (2017)             | (0 – 0)                                          | <b>0</b> (1 – 1)            | <b>-3</b> (0 – 3)         | (0 – 0)                     |
| Richardson et al. (2019)        | <b>-1</b> (0 – 1)                                | <b>-1</b> (0 – 1)           | <b>-3</b> (2 – 5)         | <b>1</b> (2 – 1)            |
| Rubin et al. (2006)             | (0 – 0)                                          | <b>-1</b> (0 – 1)           | <b>1</b> (3 – 2)          | <b>2</b> (3 – 1)            |
| Trafton et al. (2010)           | <b>1</b> (3 – 2)                                 | <b>-2</b> (1 – 3)           | <b>4</b> (9 – 5)          | <b>2</b> (4 – 2)            |
| Trinkley et al. (2021)          | <b>0</b> (1 – 1)                                 | <b>1</b> (1 – 0)            | <b>3</b> (6 – 3)          | <b>2</b> (2 – 0)            |
| Williams et al. (2016)          | <b>1</b> (2 – 1)                                 | (0 – 0)                     | <b>-2</b> (3 – 5)         | (0 – 0)                     |
| Zheng et al (2005)              | <b>-1</b> (0 – 1)                                | <b>-2</b> (0 – 2)           | <b>-2</b> (2 – 4)         | <b>0</b> (2 – 2)            |
| <b>Europe</b>                   |                                                  |                             |                           |                             |
| af Klercker et al. (1998)       | <b>-3</b> (0 – 3)                                | (0 – 0)                     | <b>-4</b> (0 – 4)         | <b>-1</b> (0 – 1)           |

|                                                |                    |                   |                    |                   |
|------------------------------------------------|--------------------|-------------------|--------------------|-------------------|
| Arts et al. (2018)                             | <b>0</b> (3 – 3)   | <b>-2</b> (0 – 2) | <b>-6</b> (3 – 9)  | <b>1</b> (2 – 1)  |
| Bindels et al. (2003)                          | <b>-2</b> (1 – 3)  | <b>-2</b> (0 – 2) | <b>0</b> (5 – 5)   | <b>2</b> (4 – 2)  |
| Helldén et al. (2015)                          | <b>2</b> (3 – 1)   | <b>-1</b> (0 – 1) | <b>3</b> (5 – 2)   | <b>5</b> (5 – 0)  |
| Heselmans et al. (2020), Koskela et al. (2016) | <b>-1</b> (2 – 3)  | <b>-2</b> (1 – 3) | <b>4</b> (7 – 3)   | <b>2</b> (4 – 2)  |
| Lugtenberg et al. (2015) (2 articles)          | <b>-5</b> (1 – 6)  | <b>-3</b> (0 – 3) | <b>-9</b> (2 – 11) | <b>0</b> (2 – 2)  |
| Pannebakker et al (2019)                       | <b>-3</b> (2 – 5)  | <b>-1</b> (1 – 2) | <b>-2</b> (1 – 3)  | <b>4</b> (4 – 0)  |
| Rieckert et al. (2018, 2019)                   | <b>-2</b> (3 – 5)  | <b>-3</b> (1 – 4) | <b>0</b> (6 – 6)   | <b>8</b> (10 – 2) |
| Rousseau et al. (2003)                         | <b>-5</b> (1 – 6)  | <b>-4</b> (0 – 4) | <b>-3</b> (4 – 7)  | <b>1</b> (3 – 2)  |
| Toth-Pal et al. (2008)                         | <b>-7</b> (3 – 10) | <b>-2</b> (0 – 2) | <b>2</b> (3 – 1)   | <b>3</b> (4 – 1)  |

### Australia

|                        |                   |                    |                    |                  |
|------------------------|-------------------|--------------------|--------------------|------------------|
| Abimbola et al. (2019) | <b>-5</b> (2 – 7) | <b>-8</b> (3 – 11) | <b>0</b> (7 – 7)   | <b>4</b> (6 – 2) |
| Bandong et al. (2019)  | <b>3</b> (3 – 0)  | <b>0</b> (1 – 1)   | <b>1</b> (5 – 4)   | <b>1</b> (2 – 1) |
| Peiris et al. (2014)   | <b>-3</b> (0 – 3) | <b>-1</b> (0 – 1)  | <b>-5</b> (2 – 7)  | <b>2</b> (2 – 0) |
| Wan et al. (2012)      | <b>-1</b> (3 – 4) | <b>-2</b> (1 – 3)  | <b>-5</b> (5 – 10) | <b>5</b>         |
| Wilson et al. (2007)   | <b>-1</b> (1 – 2) | <b>-2</b> (1 – 3)  | <b>2</b> (6 – 4)   | <b>1</b> (2 – 1) |

### South America

|                         |                   |                   |                  |                  |
|-------------------------|-------------------|-------------------|------------------|------------------|
| Maia et al. (2016)      | <b>1</b> (2 – 1)  | <b>-1</b> (1 – 2) | <b>0</b> (1 – 1) | <b>1</b> (2 – 1) |
| Marcolino et al. (2021) | <b>3</b> (4 – 1)  | <b>-1</b> (1 – 2) | <b>7</b> (8 – 1) | <b>6</b> (7 – 1) |
| Silveira et al. (2019)  | <b>-1</b> (2 – 3) | <b>-1</b> (1 – 2) | <b>2</b> (5 – 3) | <b>4</b> (5 – 1) |

### Africa

|                      |                   |                     |                   |                  |
|----------------------|-------------------|---------------------|-------------------|------------------|
| Bessat et al. (2019) | <b>-2</b> (5 – 7) | <b>-1</b> (2 – 3)   | <b>-2</b> (3 – 5) | <b>7</b> (9 – 2) |
| Jensen et al (2019)  | <b>0</b> (2 – 2)  | <b>0</b> (2 – 2)    | <b>2</b> (3 – 1)  | <b>7</b> (9 – 2) |
| Sukums et al. (2015) | <b>-4</b> (2 – 6) | <b>-10</b> (2 – 12) | <b>-5</b> (2 – 7) | <b>0</b> (1 – 1) |

### Asia

|                       |                   |                   |                  |                  |
|-----------------------|-------------------|-------------------|------------------|------------------|
| Praveen et al. (2014) | <b>-3</b> (1 – 4) | <b>-4</b> (3 – 7) | <b>1</b> (2 – 1) | <b>6</b> (6 – 0) |
|-----------------------|-------------------|-------------------|------------------|------------------|

---

Regarding the CDSS evaluated by Abimbola et al., seven barriers and two facilitators were classified in the human factor. The balance is therefore calculated at -5, which can be interpreted as a global negative impact of the human fact
